# Supplementary material for: Prevalence, parameters, and pathogenic mechanisms for splice-altering acceptor variants that disrupt the AG exclusion zone
Source: PubMed Central journal article supplement — HGG Adv. 2022 Jun 25;3(4):100125. doi: 10.1016/j.xhgg.2022.100125 (PMC9284458; doi:10.1016/j.xhgg.2022.100125), 2022-06-25
Supplement: mmc1.pdf [file mmc1.pdf]

**HGGA, Volume 3**

**Supplemental information**

**Prevalence, parameters, and pathogenic mechanisms  
for splice-altering acceptor variants  
that disrupt the AG exclusion zone**

**Samantha J. Bryen, Michaela Yuen, Himanshu Joshi, Ruebena Dawes, Katharine Zhang, Jessica K. Lu, Kristi J. Jones, Christina Liang, Wui-Kwan Wong, Anthony J. Peduto, Leigh B. Waddell, Frances J. Evesson, and Sandra T. Cooper**

## Supplemental Information

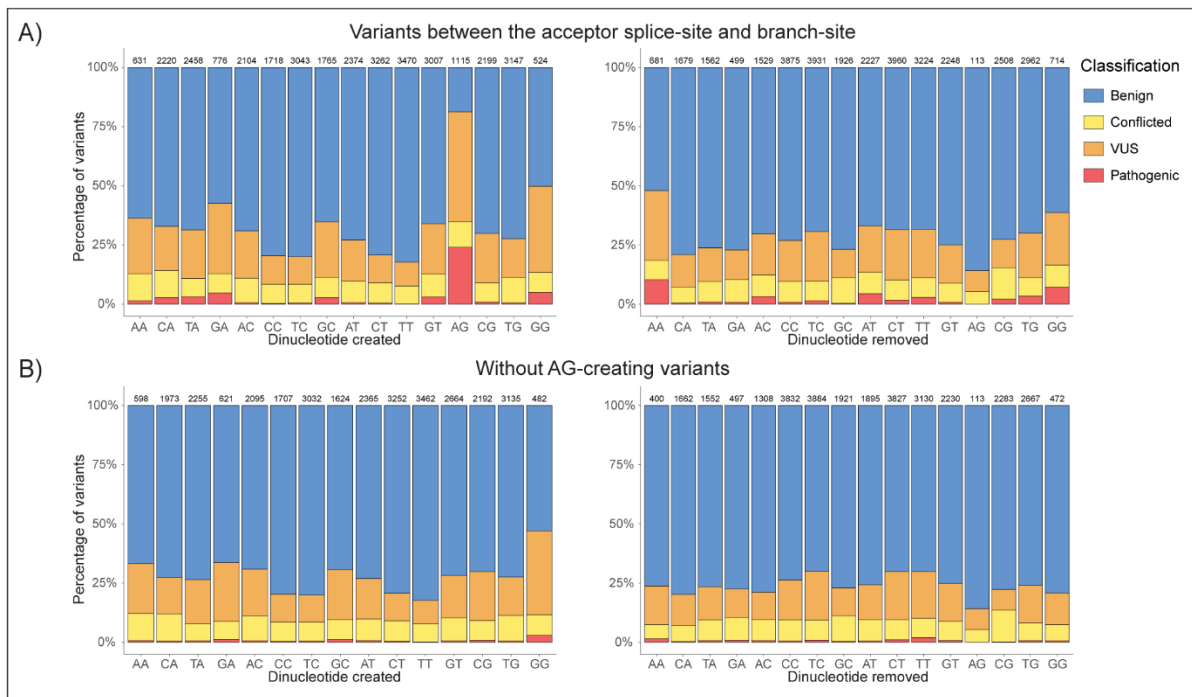

**Figure S1. All dinucleotide combinations created and removed by variants in ClinVar and LOVD between the acceptor splice-site and branch-site. A)** Each variant from the groups AG-creating, loss of 1Y, loss of  $\geq 2Y$  and other (described in Figure 1A) were determined to create and remove dinucleotide combinations. The percentage of variants with each clinical classification are shown for each combination, revealing 24.0% of created AG dinucleotides are pathogenic. All other dinucleotide combinations are 0.1-5.0% pathogenic. As multiple dinucleotide combinations were created or removed by each variant, these groups are not mutually exclusive, eg. an AG-creating variant may simultaneously create a GA dinucleotide and remove an AA dinucleotide. Thus, **B)** this analysis was repeated excluding all AG-creating variants, revealing that 2.9% of created GG dinucleotides are pathogenic and all other groups of created or removed dinucleotides were  $\leq 1.1\%$  pathogenic. The total number of variants creating or removing each combination are shown above the graphs.

**Table S1. Primer sequences for RT-PCR**

| Primer name                      | Sequence (5' to 3')                                  | Product size (normal splicing) | Annealing temperature (°C)/ extension time (s)/No. of cycles | PCR reaction    |
|----------------------------------|------------------------------------------------------|--------------------------------|--------------------------------------------------------------|-----------------|
| COL6A2_ Ex26F1<br>COL6A2_ Ex28R  | TCCACGAGAAGCACGAGAG<br>GCCTTGTGGAAGTTCTGCTC          | 268 bp                         | 58/60/x35                                                    | COL6A2<br>PCR 1 |
| COL6A2_ Ex26F1<br>COL6A2_ Ex27R  | TCCACGAGAAGCACGAGAG<br>CTGTTTGGCAGGGAAGGTC           | 174 bp                         | 58/60/x35                                                    | COL6A2<br>PCR 2 |
| COL6A2_ Ex26F2<br>COL6A2_ In27R  | CATCGATGACATGGAGGAC<br>TGCTAGTCTGGGGTGGTG            | 110 bp                         | 58/60/x35                                                    | COL6A2<br>PCR 3 |
| COL6A2_ In26F<br>COL6A2_ Ex28R   | AGCCGCTGTCTAGCGTGAG<br>GCCTTGTGGAAGTTCTGCTC          | 367 bp                         | 58/60/x35                                                    | COL6A2<br>PCR 4 |
| GAPDH_ Ex3F<br>GAPDH_ Ex6R       | TCACCAGGGCTGCTTTTAAC<br>GGCAGAGATGATGACCCTTT         | 317 bp                         | 58/60/x25,x30                                                | GAPDH           |
| SF2_ Ex3F<br>SF2_ Ex4R           | CACTGGTGTCTCGTGGAGTTTGTACGG<br>GGGCAGGAATCCACTCCTATG | N/A                            | 58/60/x35                                                    | SF2             |
| EGFP_ F<br>DMD_ Ex26_ R          | ATCACTCTCGGCATGGACGA<br>GTGTCATCCATTCGTGCATC         | 298 bp                         | 64/90/x35                                                    | DMD<br>PCR 1    |
| DMD_ Ex25/26J_ F<br>DMD_ Ex27_ R | CATGTGCCAACAGGTCTATG<br>CATTACGCCTAGTGCAGAGC         | 347 bp                         | 64/90/x35                                                    | DMD<br>PCR 2    |
| EGFP_ F<br>DMD_ Ex27_ R          | ATCACTCTCGGCATGGACGA<br>CATTACGCCTAGTGCAGAGC         | 541 bp                         | 64/120/x35                                                   | DMD<br>PCR 3    |
| Neo_ F<br>Neo_ R                 | GATGGATTGCACGCAGGTTTC<br>TCAGAGCAGCCGATTGTCTG        | 86 bp                          | 60/50/x25,x35                                                | NEO             |

**Supplemental Materials and Methods***DMD<sub>ex25-27</sub> construct sequences*

*DMD<sub>ex25-27</sub>* sequences cloned between AsiSI (SgfI)/MluI sites (underlined) of pCMV6-Entry EGFP-DYS. Canonical *DMD* exons 25, 26 and 27 highlighted in blue, EGFP highlighted in green and pseudo-exon highlighted in purple. *DMD* introns 25 and 26 were shortened by 8024 bp and 4301 bp, respectively, relative to the reference (indicated by a blue triangle in figure 7Aii). GRCh37 co-ordinates of partial *DMD* sequences included: chrX:32481711-32481265; chrX:32473240-32471457; chrX:32467155-32466573.

**> *DMD<sub>ex25-27</sub>* (wild-type, W)**

**GCGATCGCGGTACCTGCAGGACCGGTCGCCACCATGCGGGATTACAAGGATGACGACG  
ATAAGGTGAGCAAGGGCGAGGAGCTGTTACCGGGGTGGTGCCCATCCTGGTTCGAGCTG**

GACGGCGACGTAAACGGCCACAAGTTCAGCGTGTCCGGCGAGGGCGAGGGCGATGCCAC  
CTACGGCAAGCTGACCCTGAAGTTCATCTGCACCACCGGCAAGCTGCCCGTGCCCTGGCC  
CACCTCGTGACCACCCTGACCTACGGCGTGCAGTGCTTCAGCCGCTACCCCGACCACAT  
GAAGCAGCACGACTTCTTCAAGTCCGCCATGCCCGAAGGCTACGTCCAGGAGCGCACCA  
TCTTCTTCAAGGACGACGGCAACTACAAGACCCGCGCCGAGGTGAAGTTCGAGGGCGAC  
ACCCTGGTGAACCGCATCGAGCTGAAGGGCATCGACTTCAAGGAGGACGGCAACATCCT  
GGGGCACAAGCTGGAGTACAACACTACAACAGCCACAACGTCTATATCATGGCCGACAAGC  
AGAAGAACGGCATCAAGGTGAACTTCAAGATCCGCCACAACATCGAGGACGGCAGCGTG  
CAGCTCGCCGACCACTACCAGCAGAACACCCCCATCGGCGACGGCCCCGTGCTGCTGCC  
CGACAACCACTACCTGAGCACCCAGTCCGCCCTGAGCAAAGACCCCAACGAGAAGCGCG  
ATCACATGGTCCTGCTGGAGTTCGTGACCGCCGCCGGGATCACTCTCGGCATGGACGAGC  
TG**TACA**AGGGCGGCCGCAGCG**CTGGAGGACTTTTAGTCAGTGATATTCAGACAATTCAG**  
**CCCAGTCTAAACAGTGTCAATGAAGGTGGGCAGAAGATAAAGAATGAAGCAGAGCCAG**  
**AGTTTGCTTCGAGACTTGAGACAGAACTCAAAGAACTTAACACTCAGTGGGATCACATGT**  
**GCCAACAG**gtatagacaatctcttctactgtggcttgcctcaacttaactaagattcctaagtctccctcaccgtacttttggttaaggc  
ttgtctctatgttttctttaaagcacaattaattctgacaaattaatcttttctagcatatctaaatatttcatggtatataatftaaatagtacacattcatc  
ttttttgatcctaaaatgactttctgaacacaactgtcactactaaaaatgaaatcctattcttagtcattatttccaatccatgttttgttttctccattcac  
agaaaagcattgtcacacaaacagctgaattatcatcatcgggcaatacgttcattttattaagtatgccaaataaacagacatgtctattttcacactta  
tgggaaattgagtgatctgatccccatgagtattttctatgcatataagcttttacttcttcatcattactatctaagctttctgttatttacatactgatgaa  
ataatataataataatgttctactgtcaataatcgtgtttgtttgtttgtttgtggaag**GTCTATGCCAGAAAGGAGGCCTTG**  
**AAGGGAGGTTTGGAGAAAAGTGTAAAGCCTCCAGAAAGATCTATCAGAGATGCACGAAT**  
**GGATGACACAAGCTGAAGAAGAGTATCTTGAGAGAGATTTTGAATATAAAAAGTCCAGAT**  
**GAATTACAGAAAGCAGTTGAAGAGATGAAG**gtaaaaaaaaaaaaagaaaaactaagtaaaacaaaggaaataaatg  
gaaaaagaaagaatgcaacaatgcttgaagtgatacagctctgctcttctggttctaagagaagaggtgatttttaataataatftaatgactt  
caagtttaatacatfttaacaaccttaactgtttaatfttaatgcattgttgcaattatgaaaattgaaaatcacaatftgaacaatfttccctgaaatc  
atgtagtattaagagagcagaatcaactcattcattaactgtctgtagctgatgtaaattgacgttgaaaactgtgcaaaaagtattcttgaagagacaaatt  
tataatgtagtcaacaaactgtgtaatttgtagttggaaggcatttctgagaatttgaaacactaaatatttgaaccgtagcctttaataggataga  
aaggactgagttacatgtacttttctgaacaataggacaaaataacattgacttattacgaaggaaactggtatgtagtatgtagtatggatttgg

aggatgaagcctggacttgaacctacatagtgccatttcgatggccttgggcaacaatataatagcaatataatcctctgtttatcatgtttatcatca  
tacttctcacttgaatgtatgaactgttgattgtaactaccatgtgagtaaattgcctaactcagagttggtgctcaattagtagctataatcataattatta  
ttttatgtgctagcaagaacttagagaatgacttgaaatattaactgtagatcttttttggttca**aggattgtgacaaggaaaaatcaatgtggagcc**  
**agatacttgagttaaacttagttcggccccatgccaactgtataaattggggtgagttacatgagcttactgagccaaattccttcgtttgtgaactgg**  
gtatcagaatgtctgcttcagaatcattagagggatgaaatatgaaattctaacacaatgcttagcacagtataaatgacatgactcattttattatt  
ttaattgtgaaaggccacatggtaaaaaattatataattaatggtaattcagaaatatctattatagttaatagcagaaagtaactcacatgaaaactc  
agatgtttaaataatcgaatctgtcatacggctta**agtcaaatgtgaaagtaaatatctaatactccataaatatgtataaatattatgtgtgataaaact**  
ataatgaagaaaaaattagataatcatttctagagtataaa**aat**tatttcatccaagtaattataagtgatttca**aattctagactgccaatatttttaa**  
cctagttaatattgaaatattgtttcttgcctttccaacaattgtatttatcaatgtgtatatttggaccacaaatccatactccatgcagactacttt  
cagtctattctgttacagatctgttattcttataataaattatttcttaactttcaatttcaactaaactaaattatggaagagactggagttcatatta  
gatttttttgaattctcattctaactgggatgtgtgagaagaaattatagattcatagaatgcattttggatgtaaagttattttcatgctattaagag  
agcattcttttttt**ag**AGAGCTAAAGAAGAGGCCCAACAAAAGAAGCGAAAGTGAAACTCCTT  
ACTGAGTCTGTAAATAGTGTCATAGCTCAAGCTCCACCTGTAGCACAAGAGGCCCTTAAAA  
AAGGAACTTGAAACTCTAACCACCAACTACCAGTGGCTCTGCACTAGGCTGAATGGGAA  
ATGCAAGACTTTGGAA**TAA**GCTCGCTTTCTTGCTGTCCAATTTCTATTAAAGGTTCTTTG  
TTCCCTAAGTCCAACTACTAAACTGGGGGATATTATGAAGGGCCTTGAGCATCTGGATTC  
TGCCTAATAAAAAACATTTATTTTCATTGCAA**ACGCGT**

> *DMD*<sub>ex25-27</sub> (variant, V)

**GCGATCGC**GGTACCTGCAGGACCGGTCGCCACC**ATG**GCGGATTACAAGGATGACGACG  
ATAAGGTGAGCAAGGGCGAGGAGCTGTTACCGGGGTGGTGCCCATCCTGGTCGAGCTG  
GACGGCGACGTAAACGGCCACAAGTTCAGCGTGTCCGGCGAGGGCGAGGGCGATGCCAC  
CTACGGCAAGCTGACCCTGAAGTTCATCTGCACCACCGGCAAGCTGCCCGTGCCCTGGCC  
CACCCCTCGTGACCACCCTGACCTACGGCGTGCAGTGCTTCAGCCGCTACCCCGACCACAT  
GAAGCAGCACGACTTCTTCAAGTCCGCCATGCCCGAAGGCTACGTCCAGGAGCGCACCA  
TCTTCTTCAAGGACGACGGCAACTACAAGACCCGCGCCGAGGTGAAGTTCGAGGGCGAC  
ACCCTGGTGAACCGCATCGAGCTGAAGGGCATCGACTTCAAGGAGGACGGCAACATCCT  
GGGGCACAAGCTGGAGTACAACACTACAACAGCCACAACGTCTATATCATGGCCGACAAGC

AGAAGAACGGCATCAAGGTGAACTTCAAGATCCGCCACAACATCGAGGACGGCAGCGTG  
CAGCTCGCCGACCACTACCAGCAGAACACCCCCATCGGCGACGGCCCCGTGCTGCTGCC  
CGACAACCACTACCTGAGCACCCAGTCCGCCCTGAGCAAAGACCCCAACGAGAAGCGCG  
ATCACATGGTCCTGCTGGAGTTCGTGACCGCCGCCGGGATCACTCTCGGCATGGACGAGC  
TGTAAGGGCGGCCGACGCGCTGGAGGACTTTTAGTCAGTGATATTCAGACAATTCAG  
CCCAGTCTAAACAGTGTCAATGAAGGTGGGCAGAAGATAAAGAATGAAGCAGAGCCAG  
AGTTTGCTTCGAGACTTGAGACAGAACTCAAAGAACTTAACACTCAGTGGGATCACATGT  
GCCAACAGgtatagacaatctcttactgtggcttgctcaacgfacttaactaagatttcctaatgtctccctcaccgtacttttgftaaggc  
ttgttctatgttttgcttaaacacaaatattctgacaaatattcttttctagcatatctaaatatttcatggtatattttaaatagtagacattcatc  
ttattttgatcctaaatgactttctgaacacaactgtcactataaaaaatgaaatcctattcttagtcattattccaatccatgttttggtttctccattcac  
agaaaagcattgtcacacaaacagctgaattatcatcatcgggcaatcagttcattttattaagtagccaataaacagacatgtcttattttcacactta  
tgggaaattgagtgatctgatccccatgagtattttctatgcatataagcttttacttcttatcattactatctaagcttctgttattacatactgatgaa  
ataatataataaatgtttcatcactgtcaafaatcgtgtttgtttgtttgtttgtggaagGTCTATGCCAGAAAGGAGGCCTTG  
AAGGGAGGTTTGGAGAAAAGCTGTAAGCCTCCAGAAAGATCTATCAGAGATGCACGAAT  
GGATGACACAAGCTGAAGAAGAGTATCTTGAGAGAGATTTTGAATATAAAAAGCTCCAGAT  
GAATTACAGAAAGCAGTTGAAGAGATGAAGgtaaaaaaaaaaagaaaaactaagtaaaacaaaggaaataaatg  
gaaaaagaaagaaatgcaacaatgcttgaagttgtatacagctctgctcttctggttctaagagaagagggtgattttaataataatttaattagctt  
caagtttaataacattttaacaacctaaactgttaatttaaatgcattgtggcaattatgaaaattgaaaatcacaatttgaacaatttcccttgaatc  
atgtagtattaagagagcagaatcaactcattcattaactgtctgtagctgatgaaatgtacgttgaactgtgcaaaagtattcttgaagacaaatt  
tataatgtagtcaacaactgtgtaatttgtagttggaaggcatttctgagaattggaacaactaaatatttgaaccctgtagccttaatatggataga  
aaggactgagttacatgtacttttctgaacaataggacaaaatataacattgacttattacgaaggaaactggtatgtagtatgtagtatggattgg  
aggtgaagcctggacttgaacctacatagtggcatttctgatggccttgggcaacaatataatagtcfaatataatcctctgttttatcatgtttatatcatca  
tacttctcactgaaatgtatgaactgttgattgtaactaccatgtgagtaaattgcctaactcagagttggtgctcaattagtagctataatcataattatta  
ttttatgtgtagcaagaacttagagaatgacttgaatattaactgtatcttttttggttcaaggattgtgacaaggaaaaatcaatgtggagcca  
gactttagtttaaaacttagtctggccccatccaactgtataaattggggtgagttacatgagcttactgagccaaattcctctgtttgtaactggg  
tatcagaatgtctgcttcagaatcattagagggatgaaatataaaatttaacacaatgcctagcacagtataaatgacctgactcatttttattttt  
aattgtgaaaggccacatggtaaaaattatataaattaaatggttaattcagaaatctattatagtttaatagcagaagtaactcacatgaaaactca  
gatgttaaatatcgaatctgtcatcaggcctaagtcaaatgttgaagtaaatatctaatactccataaatgtataaattatgtgtataaaacta

taatgaagaaaaaattagataatcatttctagagtataaaaaatattatcatccaagtaattataagtgattcattctagactgccaatatttttaacc  
tagttaatattgaaatattgtttcttgcctttccaacaattgtatttatcaatgtgtatatatttgaccacaaatccataacctccatgcagactactttca  
gtctattctgttacagatctgtgtattctataataaattatttcttaacttccaattcaactaaactaaatttatggaagagactggagttcatattagat  
ttattttgtaattctcattctaactgggatgtgtgagaaagaaattatatgattcatagaaatgcatttggatgtaaagttatttcatgctattaagagag  
cattctttattttcagAGAGCTAAAGAAGAGGCCCAACAAAAAGAAGCGAAAGTGAAACTCCTTAC  
TGAGTCTGTAAATAGTGTCATAGCTCAAGCTCCACCTGTAGCACAAGAGGCCTTAAAAA  
AGGAACTTGAAACTCTAACCACCAACTACCAGTGGCTCTGCACTAGGCTGAATGGGAAA  
TGCAAGACTTTGGAAATAAGCTCGCTTCTTGCTGTCCAATTTCTATTAAGGTTCTTTGT  
TCCCTAAGTCCAACTACTAACTGGGGGATATTATGAAGGGCCTTGAGCATCTGGATTCT  
GCCTAATAAAAAACATTTATTTTCATTGCAAACGCGT

> *DMD*<sub>ex25-27</sub> (wild-type + extra T, +T)

GCGATCGCGGTACCTGCAGGACCGGTCGCCACCATGCGGGATTACAAGGATGACGACG  
ATAAGGTGAGCAAGGGCGAGGAGCTGTTACCGGGGTGGTGCCATCCTGGTCGAGCTG  
GACGGCGACGTAAACGGCCACAAGTTCAGCGTGTCCGGCGAGGGCGAGGGCGATGCCAC  
CTACGGCAAGCTGACCCTGAAGTTCATCTGCACCACCGGCAAGCTGCCCGTGCCCTGGCC  
CACCTCGTGACCACCCTGACCTACGGCGTGCAGTGCTTCAGCCGCTACCCCGACCACAT  
GAAGCAGCACGACTTCTTCAAGTCCGCCATGCCCCAAGGCTACGTCCAGGAGCGCACCA  
TCTTCTTCAAGGACGACGGCAACTACAAGACCCGCGCCGAGGTGAAGTTCGAGGGCGAC  
ACCCTGGTGAACCGCATCGAGCTGAAGGGCATCGACTTCAAGGAGGACGGCAACATCCT  
GGGGCACAAGCTGGAGTACAACACTACAACAGCCACAACGTCTATATCATGGCCGACAAGC  
AGAAGAACGGCATCAAGGTGAACTTCAAGATCCGCCACAACATCGAGGACGGCAGCGTG  
CAGCTCGCCGACCACTACCAGCAGAACACCCCATCGGGCGACGGCCCCGTGCTGCTGCC  
CGACAACCACTACCTGAGCACCCAGTCCGCCCTGAGCAAAGACCCCAACGAGAAGCGCG  
ATCACATGGTCCTGCTGGAGTTCGTGACCGCCGCCGGGATCACTCTCGGCATGGACGAGC  
TGTAAGGGCGGCCGACGCGCTGGAGGACTTTTAGTCAGTGATATTCAGACAATTCAG  
CCCAGTCTAAACAGTGTCAATGAAGGTGGGCAGAAGATAAAGAATGAAGCAGAGCCAG  
AGTTTGCTTCGAGACTTGAGACAGAACTCAAAGAACTTAACACTCAGTGGGATCACATGT

GCCAACAGgtatagacaatctcttctactgtggcttgccctcaacgtacttaactaagatttcctaagtctccctcaccgttacttttggttaaggc  
tttgtcctatgttttgccttaagcacaattaattctgacaaattaatcttttctagcatatctaaatatttcatggatatatftaaatagtacacattcatc  
ttttttgatcctaaaatgacttcttgaacacaactgtcactactaaaaatgaaatcctattcttagtcattattccaatccatgttttgttttctccattcac  
agaaaagcattgtcacacaaacagctgaattatcatcatcgggcaatacgttcattttattaagtagccaataaacagacatgtcttatttcacactta  
tgggaaatgagtgatctgatccccatgagttatttcttatgcatataagcttttacttctttatcattactatctaagcttctgttatttacactgatgaa  
ataatataataataatgttcatcactgtcaataatcgtgtttgtttgtttgttgaagGTCTATGCCAGAAAGGAGGCCTTG  
AAGGGAGGTTTGGAGAAAAGCTGTAAGCCTCCAGAAAGATCTATCAGAGATGCACGAAT  
GGATGACACAAGCTGAAGAAGAGTATCTTGAGAGAGATTTTGAATATAAAAAGCTCCAGAT  
GAATTACAGAAAGCAGTTGAAGAGATGAAGgtaaaaaaaaaaaaagaaaaactaagtaaaacaaggaataaatg  
gaaaaagaaagaatgcaacaatgcttgaagttgtatacagctcgtcttctggttctaagagaagaggtgattttaataataatftaatgtactt  
caagtttaataatacattttaacaaccttaaaactgtttaattttaatgcattgtggtcaattatgaaaattgaaaatcacaatttgaacaatttccctgaaatc  
atgtagtattaagagagcagaatcaactcattcattaactgtctgtagctgatgtaaatgtacgttgaaactgtgcaaaagtattcttgaagacaaaatt  
tataatgtagtcaacaaactgtgtaatttgtagttgaaggcatttctgagaattggaacactaaatatttgaaccgtagccttaatatggataga  
aaggactgagttacatgtacttttctgaacaataggacaaaatataacattgacttattcgaaggaaactggtatgtagtatgtagtatggattgg  
aggtgaagcctggacttgaacctacatagtggcatttctgatggccttgggcaacaatataatagtaataataatcctctgtttatcatgtttatatcatca  
tacttctcacttgaatgtatgaactgttattgtaactaccatgtgagtaaattgcctaactcagagttggtgctcaattagtagctataatcataattatta  
ttttatgtgctagcaagaacttagagaatgacttgaatattaactgtagtcttttttgggtcaaggattgtgacaaggaaaaatcaatgtggagcca  
gactttagtttaaaacttagtctggcccatgccaactgtataaattgggtgagttacatgagcttactgagccaaattcctctgtttgtgaactggg  
tatcagaatgtctgcttcagaatcattagagggatgaaatataaatttcaacacaatgcttagcacagtataaatgacatgactcattatttattttt  
aattgtgaaagggccacatggtaaaaaattatataaataatgtaattcagaaatatctattatagtaaatagcagaagtaactcacatgaaaactca  
gatgttaaatatcgaatctgtcatacggcttaagtcaaatgttgaaagtaaatatctaataactccataaatatgtataaataattatgtgtataaaacta  
taatgaagaaaaaattagataatcatttctagagtataaaaatatttcatccaagtaattataagtgatttcaattctagactgccaatatttttaacc  
tagttaatattgaaatatttgttcttgcctttccaacaattgtatttatcaatgtgtatatatttgaccacaaatccataacctccatgcagactactttca  
gtctattctgttacagatctgttattcttataataaattatttcttaacttccaatttcaactaaactaaatttatggaagagactggagttcatattagat  
ttattttgtaattctcattctaactgggatgtgtgagaaagaattatattgattcatagaaatgcattttggatgtaaagtattttcatgctattaagagag  
cattctttttttcagAGAGCTAAAGAAGAGGCCCAACAAAAGAAGCGAAAGTGAAACTCCTTAC  
TGAGTCTGTAAATAGTGTCATAGCTCAAGCTCCACCTGTAGCACAAAGAGGCCTTAAAAA  
AGGAACTTGAAACTCTAACCACCAACTACCAGTGGCTCTGCACTAGGCTGAATGGGAAA



TGCAAGACTTTGGAATAAGCTCGCTTCTTGCTGTCCAATTTCTATTAAGGTTCCCTTGT  
TCCCTAAGTCCAACACTAACTGGGGGATATTATGAAGGGCCTTGAGCATCTGGATTCT  
GCCTAATAAAAAACATTTATTTTCATTGCAAACGCGT

> *DMD*<sub>ex25-27</sub> (reverse silencer, GA)

GCGATCGCGGTACCTGCAGGACCGGTCCACCATGGCGGATTACAAGGATGACGACG  
ATAAGGTGAGCAAGGGCGAGGAGCTGTTACCGGGGTGGTGCCATCCTGGTTCGAGCTG  
GACGGCGACGTAAACGGCCACAAGTTCAGCGTGTCCGGCGAGGGCGAGGGCGATGCCAC  
CTACGGCAAGCTGACCCTGAAGTTCATCTGCACCACCGGCAAGCTGCCCGTGCCCTGGCC  
CACCTCGTGACCACCCTGACCTACGGCGTGCAGTGCTTCAGCCGCTACCCCGACCACAT  
GAAGCAGCACGACTTCTTCAAGTCCGCCATGCCCGAAGGCTACGTCCAGGAGCGCACCA  
TCTTCTTCAAGGACGACGGCAACTACAAGACCCGCGCCGAGGTGAAGTTCGAGGGCGAC  
ACCCTGGTGAACCGCATCGAGCTGAAGGGCATCGACTTCAAGGAGGACGGCAACATCCT  
GGGGCACAAGCTGGAGTACAACACTACAACAGCCACAACGTCTATATCATGGCCGACAAGC  
AGAAGAACGGCATCAAGGTGAACTTCAAGATCCGCCACAACATCGAGGACGGCAGCGTG  
CAGCTCGCCGACCACTACCAGCAGAACACCCCCATCGGCGACGGCCCCGTGCTGCTGCC  
CGACAACCACTACCTGAGCACCCAGTCCGCCCTGAGCAAAGACCCCAACGAGAAGCGCG  
ATCACATGGTCCTGCTGGAGTTCGTGACCGCCGCCGGGATCACTCTCGGCATGGACGAGC  
TGTAACAAGGGCGGCCGAGCGCTGGAGGACTTTTAGTCAGTGATATTCAGACAATTCAG  
CCCAGTCTAAACAGTGTCAATGAAGGTGGGCAGAAGATAAAGAATGAAGCAGAGCCAG  
AGTTTGCTTCGAGACTTGAGACAGAACTCAAAGAACTTAACACTCAGTGGGATCACATGT  
GCCAACAGgtatagacaatctcttactgtggttgctcaacgtacttaactaagatttcctaatgtctccctcaccgttacttttggttaagc  
ttgttctatgttttctttaaagcacaattaattctgacaaattaatcttttctagcatatctaaatatttcatggtatatatttaaagtacacattcatc  
ttatttgatcctaaaatgacttcttgaacacaactgtcactactaaaaatgaaatcctattcttagtcattatttccaatccatgtttgttttctccattcac  
agaaaagcattgtcacacaaacagctgaattatcatcatcgggcaatacgttcatfttattaagtagccaataaacagacatgtcttatttccactta  
tgggaaatgagtgatctgatccccatgagtattttctatgcatataagcttttacttcttattcattactatctaagcttctgttatttacactgatgaa  
ataatataataataatgttctactgtcaataatcgtgtttgtttgtttgtttgtggaagGTCTATGCCAGAAAGGAGGCCTTG  
AAGGGAGGTTTGGAGAAAAGCTGTAAGCCTCCAGAAAGATCTATCAGAGATGCACGAAT

GGATGACACAAGCTGAAGAAGAGTATCTTGAGAGAGATTTTGAATATAAACTCCAGAT  
GAATTACAGAAAGCAGTTGAAGAGATGAAGgtaaaaaaaaaaaaagaaaaactaagtaaacaaaggaaataaatg  
gaaaaagaaagaaatgcaacaatgcttgaagtggtatacagctgctcttctggttctaagagaagaggtgattttaataataatftaatttagctt  
caagtttaataatacattttaacaaccttaactgtttaatftaatgcattgtggtcaattatgaaaattgaaaatcacaatttgaacaatttcccttgaaatc  
atgtagtattaagagagcagaatcaactcattcattaactgtctgtagctgatgaaatgtacgttgaaactgtgcaaaagtattcttgaaaagacaaat  
tataatgtagtcaacaaactgtgtaatttgtagtftgaggcatttctgagaattggaacactaaatatttgaaccgtagcctttaatatggataga  
aaggactgagttacatgtacttttctgaacaataggacaaaatataacattgacttattacgaaggaaactggtatgtagtatgtagtatggatttgg  
aggagaagcctggacttgaacctacatagtgccatttctgatggccttgggcaacaatataatagcaataataatcctctgtttatcatgtttatatcatca  
tacttctcacttgaatgtatgaactgtgattgtaactaccatgtgagtaaattgcctaactcagagttggtgctcaattagtagctataatcataaftatta  
ttttatgtgtagcaagaacttagagaatgacttgaatattaactgtgatcttttttggttcaaggatttgacaaggaaaaatcaatgtggagcc  
agatacttgagtttaaaacttagtctggcccatgccaactgtataaattggggtgagttacatgagcttactgagccaaattccttctgttgaaactgg  
gtatcagaatgtctgcttcagaatcattagagggatgaaatataaatttcaacacaatgcctagcacagtataaatgacatgactcattattattatt  
ttaattgtgaaaggccacatggtaaaaattatataaftaaatggtaattcagaaatatctattatagtaaatagcagaaagtaactcacatgaaaactc  
agatgtttaaatatcgaatctgtcatacggcttaagtcaaatgtgaaagtaaatatctaatatactccataaatatgtataaatattatgtgtgataaaact  
ataatgaagaaaaatagataatcatttctagagtataaaaatattattcatccaagtaattataagtattcattctagactgccaaatatttttaa  
cctagttaatattgaaatatttgttcttgccttttcaacaattgtatttatcaatgtgtatattttgaccacaaatccataacctccatgcagactactttt  
cagctattcttgttacagatctgtgtattcttataataaattatttcttaacttccaattcaactaaactaaattatggaagagactggagttcatatta  
gatttttttgaattctcattctaactgggatgtgtgagaagaattatattgattcatagaatgcattttggatgtaaagttatttcatgctattaagag  
agcattcttattttcagAGAGCTAAAGAAGAGGCCCAACAAAAAGAAGCGAAAGTGAAACTCCTT  
ACTGAGTCTGTAAATAGTGTCATAGCTCAAGCTCCACCTGTAGCACAAAGAGGCCTTAAAA  
AAGGAACTTGAAACTCTAACCACCAACTACCAGTGGCTCTGCACTAGGCTGAATGGGAA  
ATGCAAGACTTTGGAA TAA GCTCGCTTTCTTGCTGTCCAATTTCTATTAAAGGTTCCCTTG  
TTCCCTAAGTCCA ACTACTAACTGGGGGATATTATGAAGGCCTTGAGCATCTGGATTC  
TGCCTAATAAAAAACATTTATTTTCATTGCAA ACGCGT

> *DMD*<sub>ex25-27</sub> (alternative AG No.1, AG1)

GCGATCGCGGTACCTGCAGGACCGGTCGCCACC ATGGCGGATTACAAGGATGACGACG  
ATAAGGTGAGCAAGGGCGAGGAGCTGTTACCGGGGTGGTGCCATCCTGGTTCGAGCTG

GACGGCGACGTAAACGGCCACAAGTTCAGCGTGTCCGGCGAGGGCGAGGGCGATGCCAC  
CTACGGCAAGCTGACCCTGAAGTTCATCTGCACCACCGGCAAGCTGCCCGTGCCCTGGCC  
CACCCTCGTGACCACCCTGACCTACGGCGTGCAGTGCTTCAGCCGCTACCCCGACCACAT  
GAAGCAGCACGACTTCTTCAAGTCCGCCATGCCCGAAGGCTACGTCCAGGAGCGCACCA  
TCTTCTTCAAGGACGACGGCAACTACAAGACCCGCGCCGAGGTGAAGTTCGAGGGCGAC  
ACCCTGGTGAACCGCATCGAGCTGAAGGGCATCGACTTCAAGGAGGACGGCAACATCCT  
GGGGCACAAGCTGGAGTACAACACTACAACAGCCACAACGTCTATATCATGGCCGACAAGC  
AGAAGAACGGCATCAAGGTGAACTTCAAGATCCGCCACAACATCGAGGACGGCAGCGTG  
CAGCTCGCCGACCACTACCAGCAGAACACCCCCATCGGCGACGGCCCCGTGCTGCTGCC  
CGACAACCACTACCTGAGCACCCAGTCCGCCCTGAGCAAAGACCCCAACGAGAAGCGCG  
ATCACATGGTCCTGCTGGAGTTCGTGACCGCCGCCGGGATCACTCTCGGCATGGACGAGC  
TG**TACA**AGGGCGGCCGCAGCG**CTGGAGGACTTTTAGTCAGTGATATTCAGACAATTCAG**  
**CCCAGTCTAAACAGTGTCAATGAAGGTGGGCAGAAGATAAAGAATGAAGCAGAGCCAG**  
**AGTTTGCTTCGAGACTTGAGACAGAACTCAAAGAACTTAACACTCAGTGGGATCACATGT**  
**GCCAACAG**gtatagacaatctcttctactgtggcttgcctcaacttaactaagattcctaagtctccctcaccgtacttttggttaaggc  
ttgttctatgttttctttaaagcacaattaattctgacaaattaatcttttctagcatatctaaatatttcatggtatatatttaaatagtacacattcatc  
ttttttgatcctaaaatgactttctgaacacaactgtcactaataaaatgaaatcctattcttagtcattatttccaatccatgttttgttttctccattcac  
agaaaagcattgtcacacaaacagctgaattatcatcatcgggcaatcagttcattttattaagtatgccaataaacagacatgtctattttcacactta  
tgggaaattgagtgtatctgatccccatgagtattttctatgcatataagcttttacttcttctcattactatctaagctttctgttatttacatactgatgaa  
ataatataataataatgttctactgtcaataatcgtgtttgtttgtttgtttgtggaag**GTCTATGCCAGAAAGGAGGCCTTG**  
**AAGGGAGGTTTGGAGAAAAGTGTAAAGCCTCCAGAAAGATCTATCAGAGATGCACGAAT**  
**GGATGACACAAGCTGAAGAAGAGTATCTTGAGAGAGATTTTGAATATAAAACTCCAGAT**  
**GAATTACAGAAAGCAGTTGAAGAGATGAAG**gtaaaaaaaaaaaaagaaaaactaagtaaaacaaaggaaataaatg  
gaaaaagaaagaaatgcaacaatgcttgaagttgtatacagctctgcttctcctggttctaagagaagaggtgatttttaataataatttaatttagctt  
caagtttaatacatatttaacaaccttaaaactgttaattttaatgcattgttgcaattatgaaaattgaaaatcacaatttgaacaatttcccttgaatc  
atgtagtattaagagagcagaatcaactcattcattaactgtctgtagctgatgtaaattgacgttgaaaactgtgcaaaagtattcttgaagagacaaatt  
tataatgtagtcaacaaactgtgttaatttgtagttgaaggcatttctgagaatttgaaacactaaatatttgaaccgtagcctttaataggataga  
aaggactgagttacatgtacttttctgaacaataggacaaaataacattgacttattacgaaggaaactggtatgtagtatgtagtatggatttgg

aggatgaagcctggacttgaacctacatagtgccatttcgatggccttgggcaacaatataatagcaatataatcctctgtttatcatgtttatcatca  
tacttctcacttgaatgtatgaactgttgattgtaactaccatgtgagtaaattgcctaactcagagttggtgctcaattagtagctataatcataattatta  
ttttatgtgctagcaagaacttagagaatgacttgaaatattaafacagatatcttttttggttcaaggattgtgacaaggaaaaatcaatgtggagcc  
agatacttgagttaaaacttagttcggcccatgccaactgtataaattgggtgagttacatgagcttactgagccaaattccttctgttgaactgg  
gtatcagaatgtctgcttcagaatcattagagggatgaaatatgaaattctaacacaatgcttagcacagtataaatgacatgactcattattattatt  
ttaattgtgaaaggccacatggtaaaaattatataaattaaatggaattcagaaatatctattatagttaatagcagaaagtaactcacatgaaaactc  
agatgtttaaataatcgaatctgtcatacggcttaagtcaaatgtgaaagtaaatatctaatactccataaatatgtataaatattatgtgtgataaaact  
ataatgaagaaaaaattagataatcatttctagagtattaaaaatattattcatccaagtaattataagtgatttcaattctagactgccaatatttttaa  
cctagttaatattgaaatattgttcttgcctttccaacaattgtatttatcaatgtgtatatttgaccacaaatccatactccatgcagactacttt  
cagctattctgttacagatctgttattcttataataaattatttcttaacttccaattcaactaaactaaattatggaagagactggagttcatatta  
gatttttttgaattctcattctaactgggatgtgtgagaagaaattatagattcatagaatgcattttggatgtaaagtattttcatgctattaagag  
agcattctttttttcagAGAGCTAAAGAAGAGGCCCAACAAAAGAAGCGAAAGTGAAACTCCTT  
ACTGAGTCTGTAAATAGTGTTCATAGCTCAAGCTCCACCTGTAGCACAAGAGGCCCTTAAAA  
AAGGAACTTGAAACTCTAACCACCAACTACCAGTGGCTCTGCACTAGGCTGAATGGGAA  
ATGCAAGACTTTGGAAATAAGCTCGCTTTCTTGCTGTCCAATTTCTATTAAAGGTTCTTTG  
TTCCCTAAGTCCAACCTACTAACTGGGGGATATTATGAAGGGCCTTGAGCATCTGGATTC  
TGCCTAATAAAAAACATTTATTTTCATTGCAAACGCGT

> *DMD*<sub>ex25-27</sub> (alternative AG No.2, AG2)

GCGATCGCGGTACCTGCAGGACCGGTCGCCACCATGCGGGATTACAAGGATGACGACG  
ATAAGGTGAGCAAGGGCGAGGAGCTGTTACCGGGGTGGTGCCCATCCTGGTTCGAGCTG  
GACGGCGACGTAAACGGCCACAAGTTCAGCGTGTCCGGCGAGGGCGAGGGCGATGCCAC  
CTACGGCAAGCTGACCCTGAAGTTCATCTGCACCACCGGCAAGCTGCCCGTGCCCTGGCC  
CACCTCGTGACCACCCTGACCTACGGCGTGCAGTGCTTCAGCCGCTACCCCGACCACAT  
GAAGCAGCACGACTTCTTCAAGTCCGCCATGCCCGAAGGCTACGTCCAGGAGCGCACCA  
TCTTCTTCAAGGACGACGGCAACTACAAGACCCGCGCCGAGGTGAAGTTCGAGGGCGAC  
ACCCTGGTGAACCGCATCGAGCTGAAGGGCATCGACTTCAAGGAGGACGGCAACATCCT  
GGGGCACAAGCTGGAGTACAACACTACAACAGCCACAACGTCTATATCATGGCCGACAAGC

AGAAGAACGGCATCAAGGTGAACTTCAAGATCCGCCACAACATCGAGGACGGCAGCGTG  
CAGCTCGCCGACCACTACCAGCAGAACACCCCCATCGGCGACGGCCCCGTGCTGCTGCC  
CGACAACCACTACCTGAGCACCCAGTCCGCCCTGAGCAAAGACCCCAACGAGAAGCGCG  
ATCACATGGTCCTGCTGGAGTTCGTGACCGCCGCCGGGATCACTCTCGGCATGGACGAGC  
TGTAAGGGCGGCCGCAGCGCTGGAGGACTTTTAGTCAGTGATATTCAGACAATTCAG  
CCCAGTCTAAACAGTGTCAATGAAGGTGGGCAGAAGATAAAGAATGAAGCAGAGCCAG  
AGTTTGCTTCGAGACTTGAGACAGAACTCAAAGAACTTAACACTCAGTGGGATCACATGT  
GCCAACAGgtatagacaatctcttactgtggcttgctcaacgfacttaactaagatttcctaagtctccctcaccgtacttttgftaaggc  
ttgttctatgttttcttaagcacaattaattctgacaaattaatcttttctagcatatctaaatcttcatggtatataatgtaacacattcatc  
ttttttgatcctaaatgactttctgaacacaactgtcactataaaaaatgaaatcctattcttagtcattattccaatccatgtttgttttctccattca  
agaaaagcattgtcacacaaacagctgaattatcatcatcgggcaatcagttcattttattaagtagccaataaacagacatgtcttatttccactta  
tgggaaattgagtgatctgatccccatgagtattttctatgcatataagcttttacttcttaccattactatctaagcttctgttattacatactgatga  
ataatataataaatgttcatcactgtcaafaatcgtgtttgtttgtttgttggaaagGTCTATGCCAGAAAGGAGGCCTTG  
AAGGGAGGTTTGGAGAAAAGCTGTAAGCCTCCAGAAAGATCTATCAGAGATGCACGAAT  
GGATGACACAAGCTGAAGAAGAGTATCTTGAGAGAGATTTTGAATATAAAAAGCTCCAGAT  
GAATTACAGAAAGCAGTTGAAGAGATGAAGgtaaaaaaaaaaagaaaaactaagtaaaacaaggaaataaatg  
gaaaaagaaagaaatgcaacaatgcttgaagtgatatacagctctgcttctctggttctaagagaagagggtgattttaataataatgtaattgactt  
caagtttaataacatttaacaacctaaactgttaatttaataatgcattgtggcaattatgaaaatgaaaatcacaattgaaacaatttccctgaaatc  
atgtagtattaagagagcagaatcaactcattcattaactgtctgtagctgatgaaatgtacgttgaactgtgcaaaagtattctgaaaagacaaatt  
tataatgtagtcaacaactgtgtaatttgtagttgaggcatttctgagaattggaacaactaaatattgaaaccgtagccttaatatggataga  
aaggactgagttacatgacttttctgaaacaataggacaaaatataacattgacttattacgaaggaaactggtatgtagtatgtagtatggattgg  
aggtgaagcctggacttgaacctacatagtgccattcgtatggccttgggcaacaatataatagtcfaatataatcctctgtttatcatgtttatatcatca  
tacttctcactgaaatgtatgaactgttgattgtaactaccatgtgagtaaattgcctaactcagagttggtgctcaattagtagctataatcataattatta  
ttttatgtgtagcaagaacttagagaatgacttgaatattaactgtatctttttttagtcaaggattgtgacaaggaaaaatcaatgtggagcca  
gactttagtftaaaacttagtctggccccatccaactgtataaattggggtgagttacatgagcttactgagccaaattcctctgtttgtaactggg  
tatcagaatgtctgcttcagaatcattagagggatgaaatgaaatttcaacacaatgcctagcacagtataaatgacctgactcattatttattttt  
aattgtgaaaggccacatggtaaaaaattatataaattaaatggtaattcagaaatctattatagttaatagcagaagtaactcacatgaaactca  
gatgttaaatatcgaatctgtcatcaggcctaagtcaaatgttgaagtaaatctaatatactccataaatgtataaattatgtgtataaaacta

taatgaagaaaaattagataatcatttctagagtataaaaatattatcatccaagtaattataagtgattcaattctagactgccaatatttttaacc  
tagttaatattgaaatatttgttcttgcctttccaacaattgtatttatcaatgtgtatatatttgaccacaaatccataacctccatgcagactactttca  
gtctattctgttacagatctgtgtattctataataaattatttcttaacttccaattcaactaaacttaaattatggaagagactggagttcatattagat  
ttattttgtaattctcattctaactgggatgttgagaaagaaattatatgattcatagaaatgcatttggatgtaaagttatttcatgctattaagagag  
cattctttattttcagAGAGCTAAAGAAGAGGCCCAACAAAAAGAAGCGAAAGTGAAACTCCTTAC  
TGAGTCTGTAAATAGTGTCATAGCTCAAGCTCCACCTGTAGCACAAGAGGCCTTAAAAA  
AGGAACTTGAAACTCTAACCACCAACTACCAGTGGCTCTGCACTAGGCTGAATGGGAAA  
TGCAAGACTTTGGAA**TAA**GCTCGCTTTCTTGCTGTCCAATTTCTATTAAAGGTTTCCTTTGT  
TCCCTAAGTCCAACTACTAAACTGGGGGATATTATGAAGGGCCTTGAGCATCTGGATTCT  
GCCTAATAAAAAACATTTATTTTCATTGCAA**ACGCGT**
